# Supplementary material
Source: PubMed Central journal article supplement (PMC8366235)
Supplement: sj-pdf-2-jvd-10.1177_10406387211023481.pdf [file sj-pdf-2-jvd-10.1177_10406387211023481.pdf]

|                                                                                                                         |                                                       |                                                                                                                           |                                                                                                                                 |
|-------------------------------------------------------------------------------------------------------------------------|-------------------------------------------------------|---------------------------------------------------------------------------------------------------------------------------|---------------------------------------------------------------------------------------------------------------------------------|
| EPI_ISL_430292, EPI_ISL_430295                                                                                          | Santa Clara County Public Health Department           | Chiu Laboratory, University of California, San Francisco                                                                  | Xianding Deng, Scot Federman, Wei Gu, Elsa Villarino, Brandon Bonin, Debra A. Wadford, and Charles Y. Chiu                      |
| EPI_ISL_435580, EPI_ISL_435581,<br>EPI_ISL_435582, EPI_ISL_435583,<br>EPI_ISL_435584, EPI_ISL_435585,<br>EPI_ISL_435587 | Lednický Laboratory at Emerging Pathogens Institute   | University of Florida                                                                                                     | Lednický, J.A., Gibson, J.C., Alam, M.M., Stephenson, C.J., Elbadry, M.A. and Morris, J.G.                                      |
| EPI_ISL_447900                                                                                                          | California Department of Public Health                | California Department of Public Health                                                                                    | CDPH IDLB COVIDNet                                                                                                              |
| EPI_ISL_515909, EPI_ISL_515910,<br>EPI_ISL_515911                                                                       | Wadsworth Center, New York State Department of Health | Wadsworth Center, New York State Department of Health                                                                     | Kirsten St. George, Daryl M. Lamson, Sara Griesemer, Jonathan Plitnick, Navjot Singh, Matthew D. Shudt, Erica Lasek-Nesselquist |
| EPI_ISL_525575                                                                                                          | UCLA Pathology Clinical Microbiology Lab              | Kruglyak Lab                                                                                                              | Guo et al.                                                                                                                      |
| EPI_ISL_537558                                                                                                          | Washington State Public Health Laboratories           | Pathogen Discovery, Respiratory Viruses Branch, Division of<br>Viral Diseases, Centers for Disease Control and Prevention | Ying Tao, Yan Li, Clinton Paden, Jing Zhang, Krista Queen, Anna Uehara, Haibin Wang, Julu Bhatnagar, Suxiang Tong               |
| EPI_ISL_594459                                                                                                          | Madigan Army Medical Center                           | U.S. Air Force School of Aerospace Medicine                                                                               | Emily Parsons, Matthew Timlin, Clarise Starr, Anthony Fries, Ronald Wells, Matthew Studer, Rebecca Sainato                      |
| EPI_ISL_644823                                                                                                          | Santa Clara County Public Health Department           | Chiu Laboratory, University of California, San Francisco                                                                  | Xianding Deng, Scot Federman, Wei Gu, Elsa Villarino, Brandon Bonin, Debra A. Wadford, and Charles Y. Chiu                      |
| EPI_ISL_671764                                                                                                          |                                                       |                                                                                                                           |                                                                                                                                 |
